# Supplementary material for: RMS: A ML-based system for ICU Respiratory Monitoring and Resource Planning
Source: bioRxiv or medRxiv preprint supplement (doi:10.1101/2024.01.23.24301516), 2024-12-20
Supplement: Supplementary file [file media-2.pdf]

# Supplemental Materials

**Supplemental Table 1.** Details on the clinical parameters extracted in the HiRID-II dataset (downloadable XLSX file).

**Supplemental Table 2.** Details on the imputation parameters, such as normal value, and imputation models, for the clinical parameters (downloadable XLSX file).

**Supplemental Table 3.** List of important variables used for computing complex features, as a basis for variable selection, and for building the final models RMS-RF/RMS-EF/RMS-MV<sub>Start</sub>/RMS-MV<sub>End</sub> (downloadable XLSX file).

**Supplemental Table 4.** List of severity levels for computing 'instability history' features, for a subset of the important variables. (downloadable XLSX file).

**Supplemental Table 5.** Model training parameters and grid used for selection of hyperparameters for the LightGBM library (downloadable XLSX file).
